# Supplementary material for: Effect of open versus video-assisted thoracoscopy on perioperative outcomes and survival for cases of thymic carcinomas and thymic neuroendocrine tumors
Source: PubMed Central journal article supplement (PMC10578011; doi:10.1186/s12957-023-03210-7), 2023-10-16

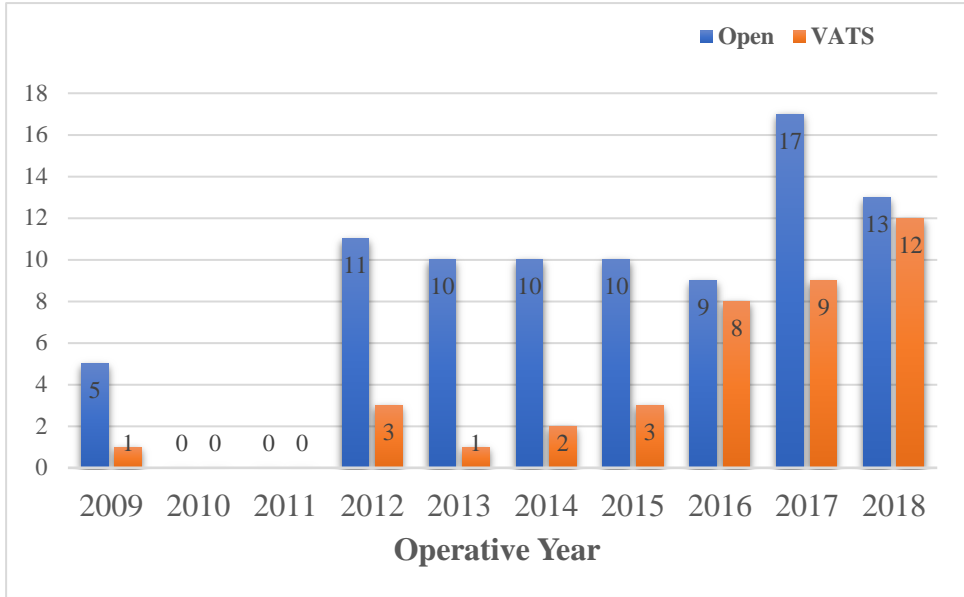

Supplement: 12957_2023_3210_MOESM2_ESM.pdf [file 12957_2023_3210_MOESM2_ESM.pdf]
